# Supplementary material for: The use of bicarbonate for microalgae cultivation and its carbon footprint analysis
Source: Royal Society of Chemistry journal article supplement (doi:10.1039/c9gc01107b), 2019-01-01
Supplement: c9gc01107b1.pdf [file c9gc01107b1.pdf]

## **ELECTRONIC SUPPLEMENTARY INFORMATION**

### **The use of bicarbonate for microalgae cultivation and its carbon footprint analysis**

Ga-Yeong Kim<sup>a</sup>, Kosan Roh<sup>b,1</sup>, and Jong-In Han<sup>a,\*</sup>

<sup>a</sup> Department of Civil and Environmental Engineering, Korea Advanced Institute of Science and Technology (KAIST), 291 Daehak-ro, Daejeon, 34141, Republic of Korea

<sup>b</sup> Department of Chemical and Biomolecular Engineering, Korea Advanced Institute of Science and Technology (KAIST), 291 Daehak-ro, Daejeon, 34141, Republic of Korea

\* Corresponding author: Jong-In Han (E-mail address: hanj2@kaist.ac.kr)

---

<sup>1</sup> Current address: AVT.SVT, RWTH Aachen University, Forckenbeckstr. 51, 52074 Aachen, Germany

**Fig. S1.** The specific growth rates of eight algal species with various concentrations of  $\text{NaHCO}_3$ : (a) *Micractinium inermum*; (b) *Chlorella sorokiniana*; (c) *Chlorella vulgaris*; (d) *Scenedesmus* sp.; (e) *Nannochloropsis gaditana*; (f) *Tetraselmis suecica*; (g) *Tetraselmis chuii*; and (h) *Aphanothece* sp.. All values and error bars represent averages and standard deviations, respectively (n = 3).

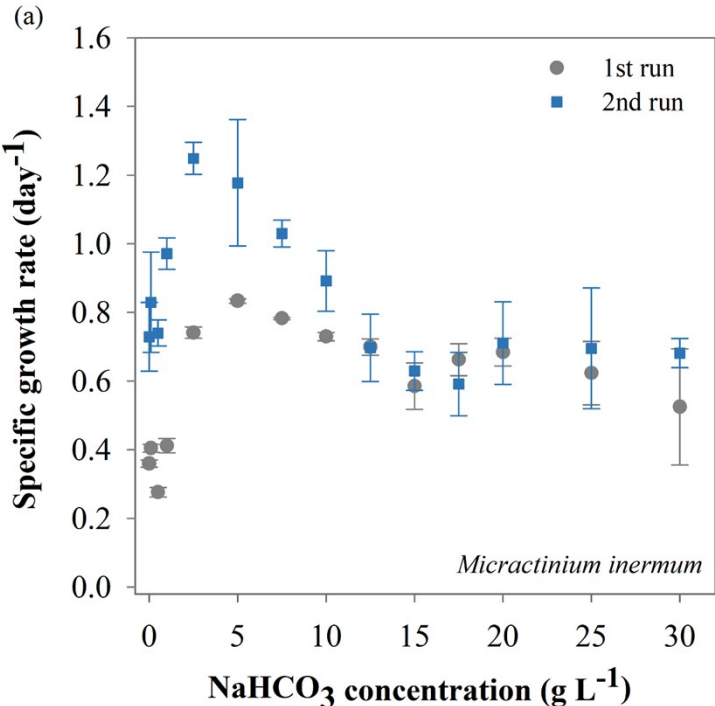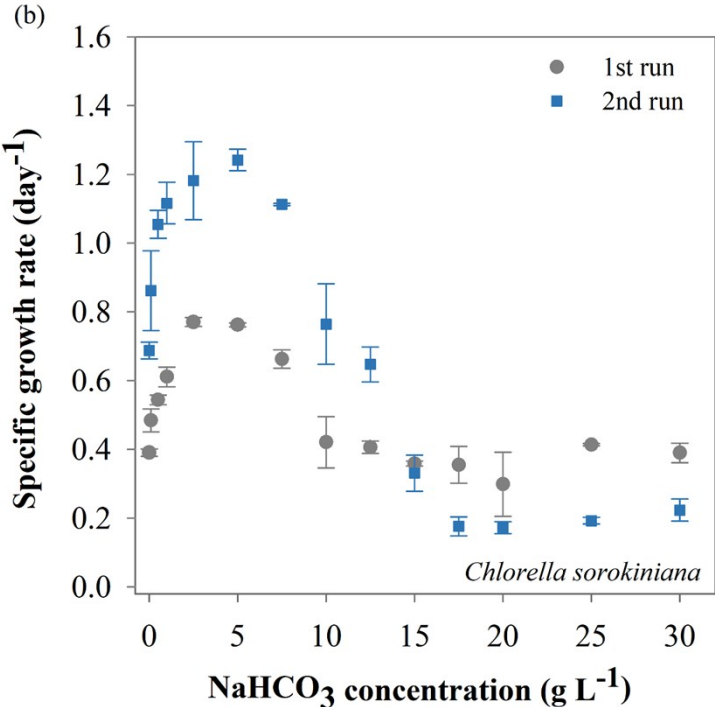

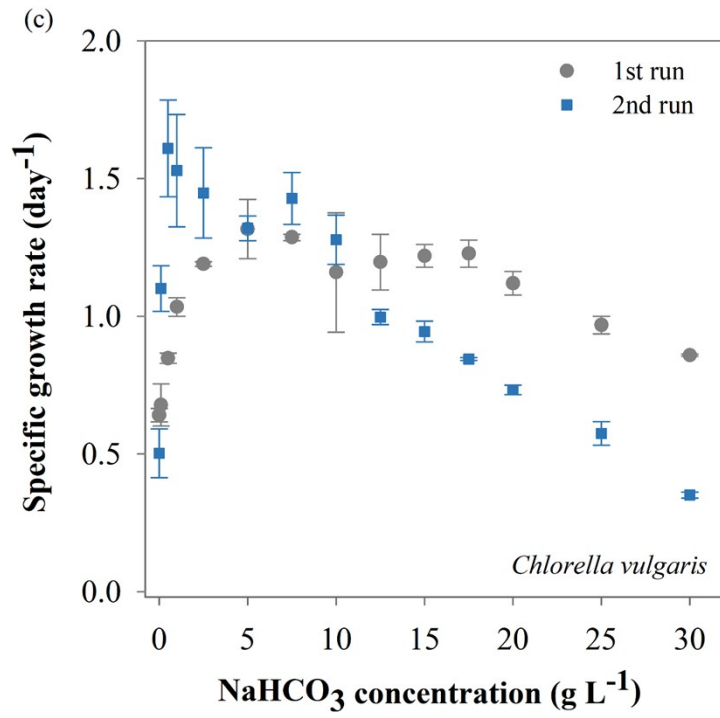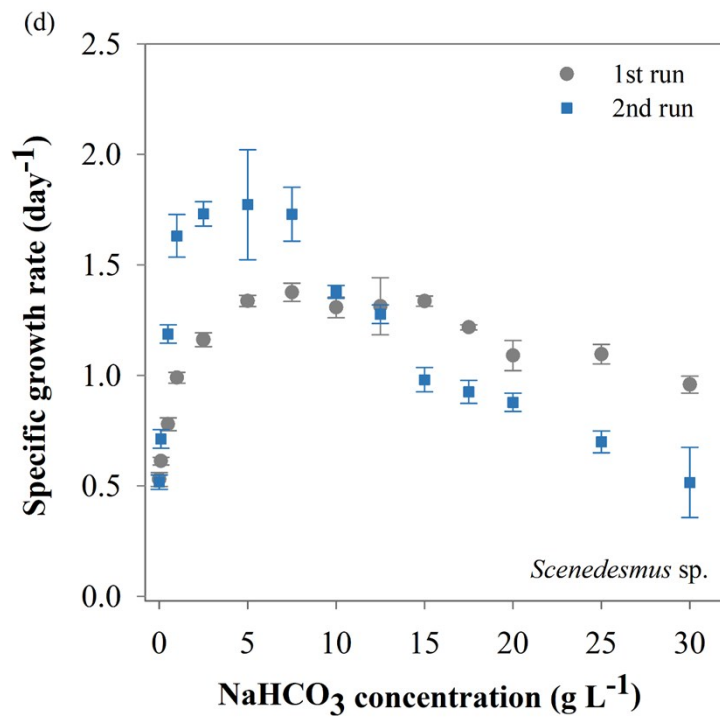

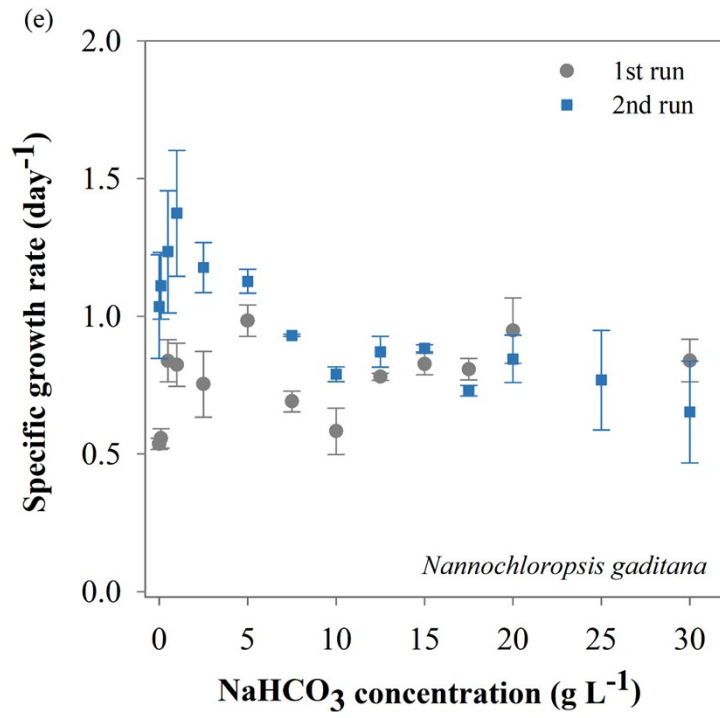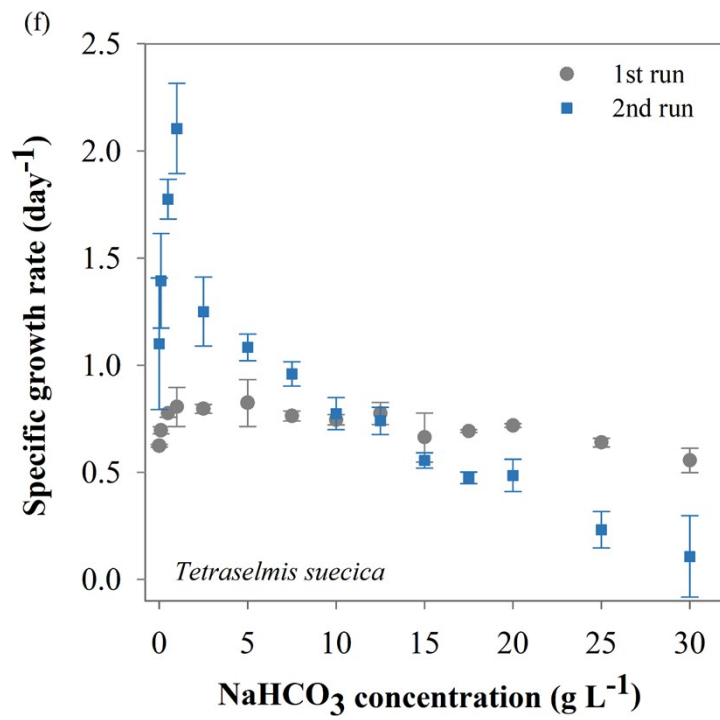

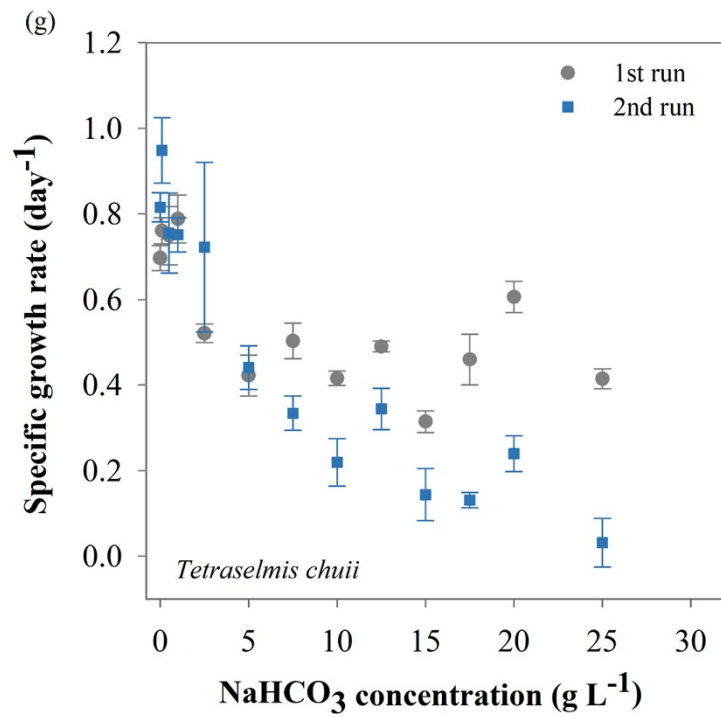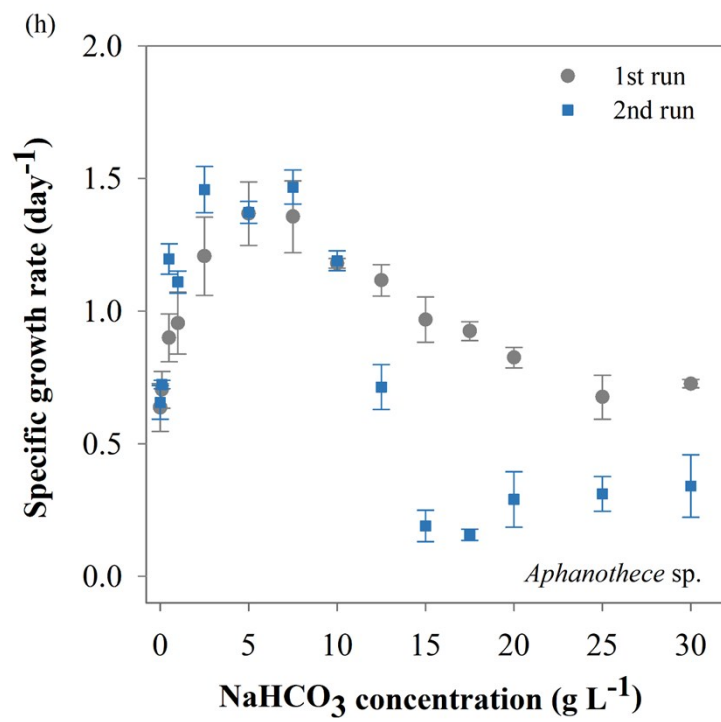

**Fig. S2.** The optimization of temperature and light intensity (1) with 5% (v/v) of CO<sub>2</sub> supply, and (2) with optimal concentrations of NaHCO<sub>3</sub>: (a) *Micractinium inermum*; (b) *Chlorella sorokiniana*; (c) *Chlorella vulgaris*; (d) *Scenedesmus* sp.; (e) *Nannochloropsis gaditana*; (f) *Tetraselmis suecica*; (g) *Tetraselmis chuii*; and (h) *Aphanothece* sp.. Red color represents high specific growth rate (day<sup>-1</sup>), and purple for low specific growth rate. Minus specific growth rates were plotted as zero.

(a1) *Micractinium inermum* with 5% CO<sub>2</sub>

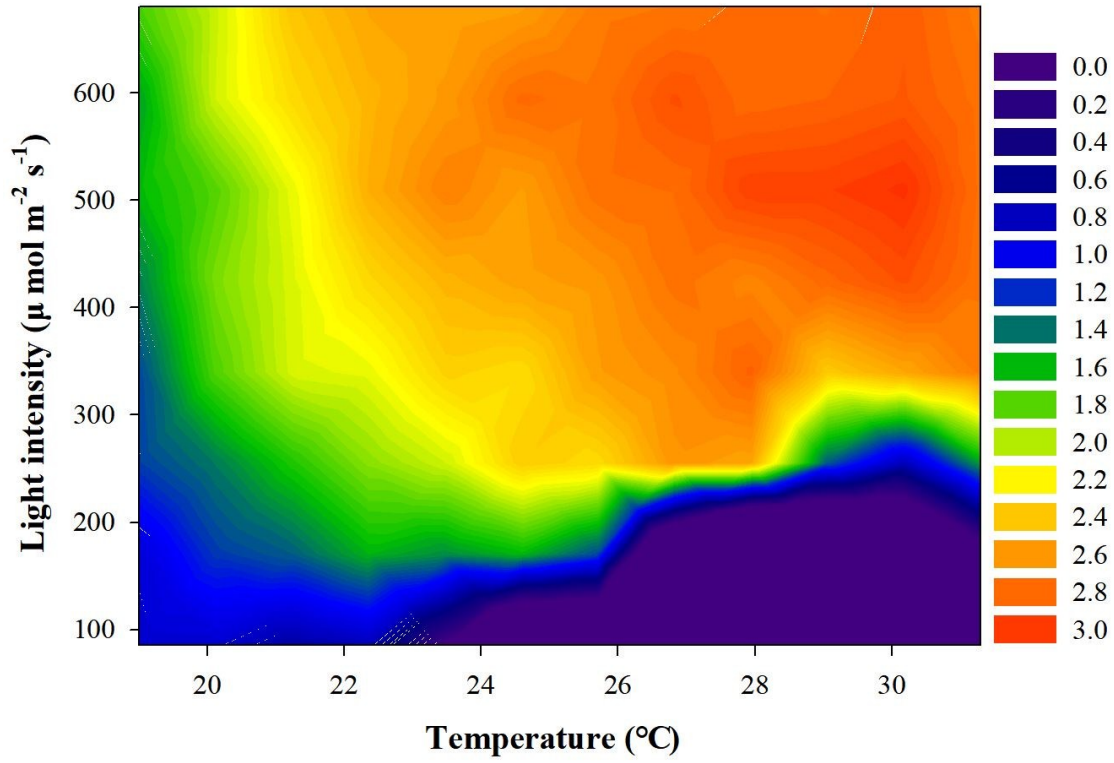

(a2) *Micractinium inermum* with 2.5 g L<sup>-1</sup> of NaHCO<sub>3</sub>

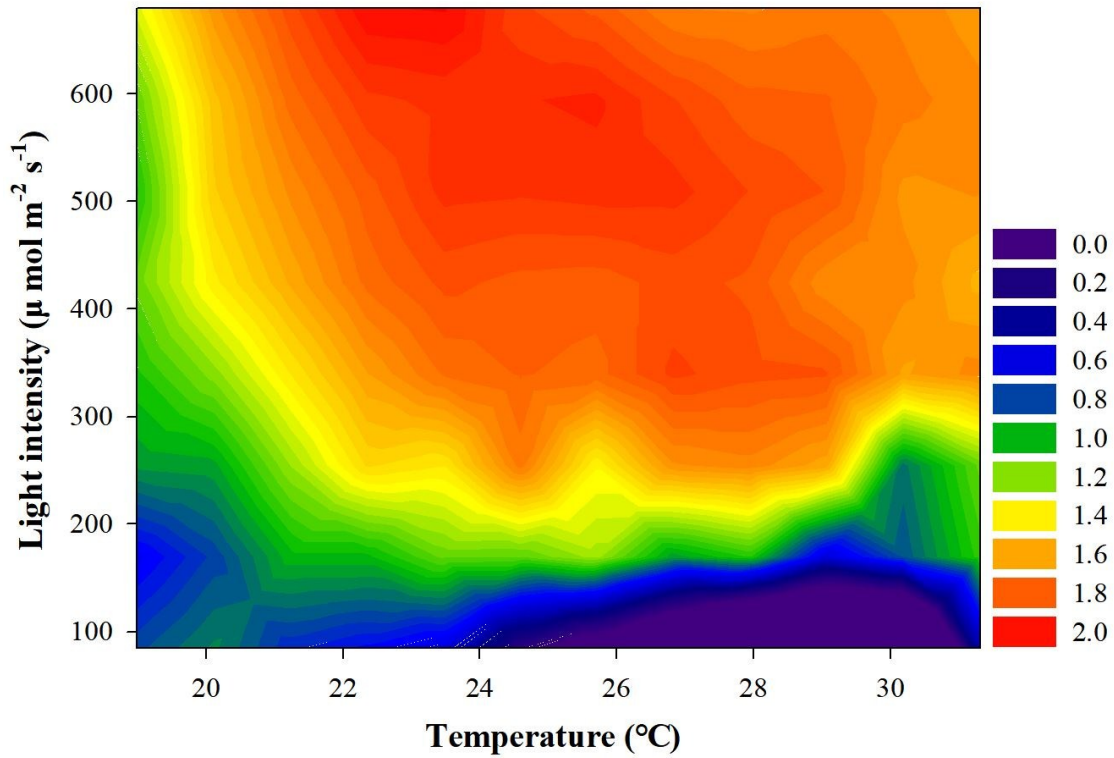

(b1) *Chlorella sorokiniana* with 5% CO<sub>2</sub>

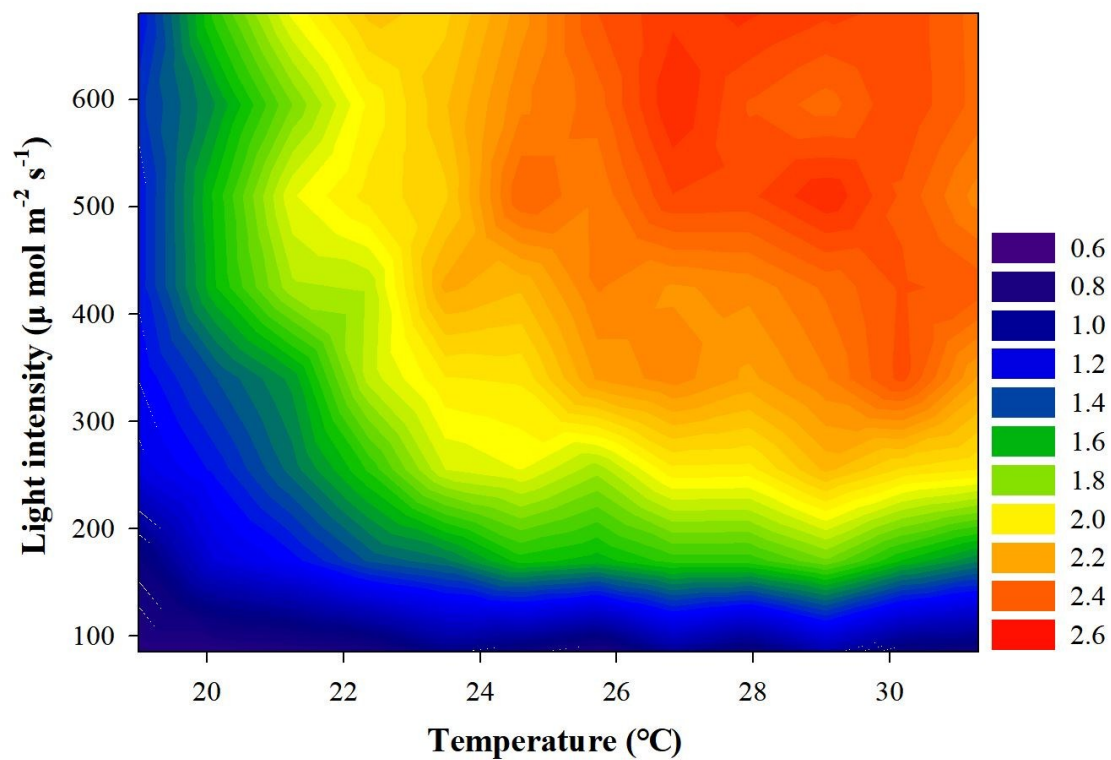

(b2) *Chlorella sorokiniana* with 5 g L<sup>-1</sup> of NaHCO<sub>3</sub>

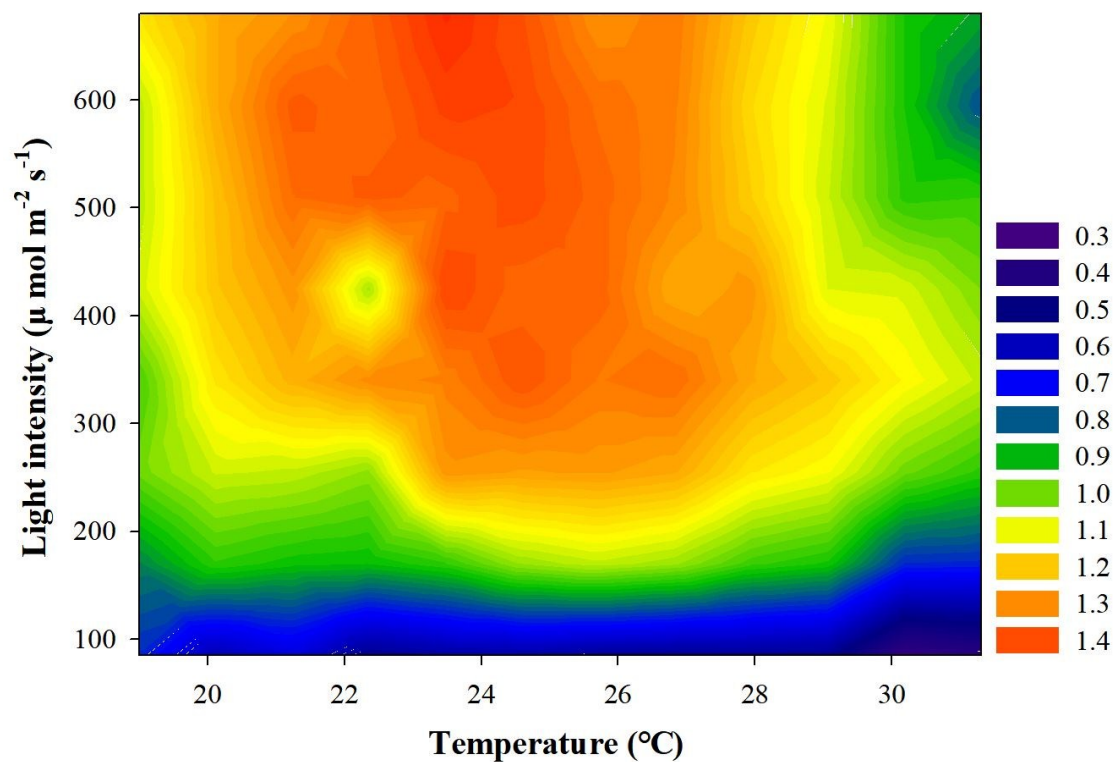



(c1) *Chlorella vulgaris* with 5% CO<sub>2</sub>

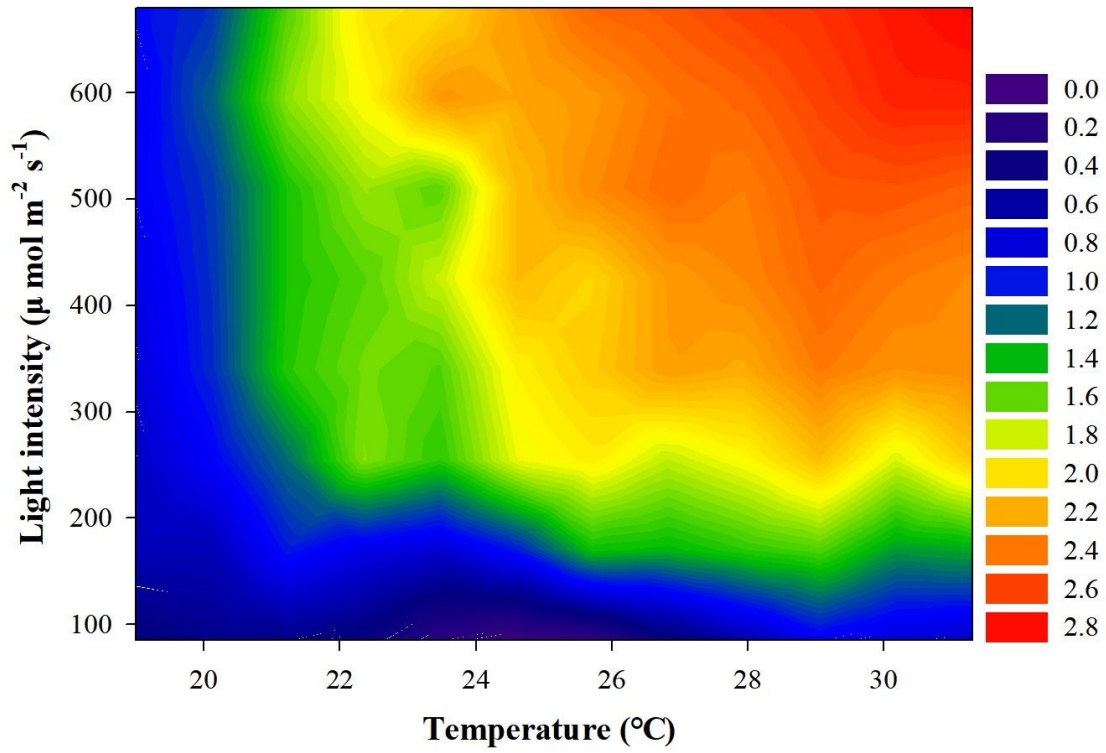

(c2) *Chlorella vulgaris* with 0.5 g L<sup>-1</sup> of NaHCO<sub>3</sub>

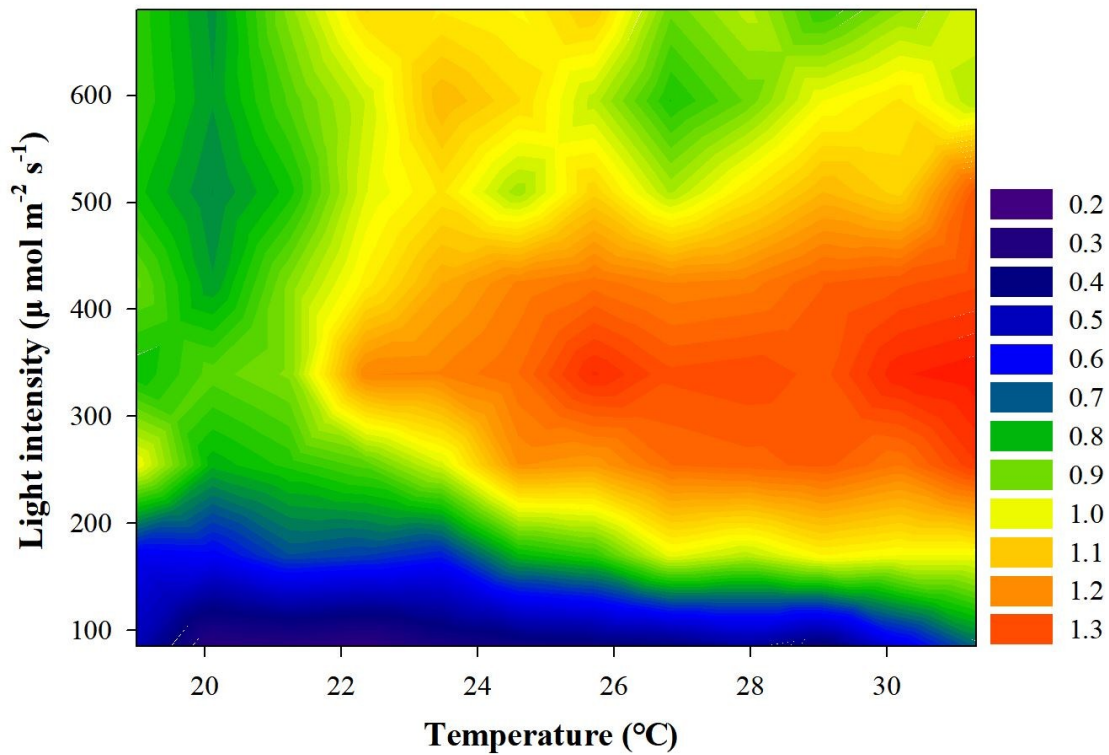

(d1) *Scenedesmus* sp. with with 5% CO<sub>2</sub>

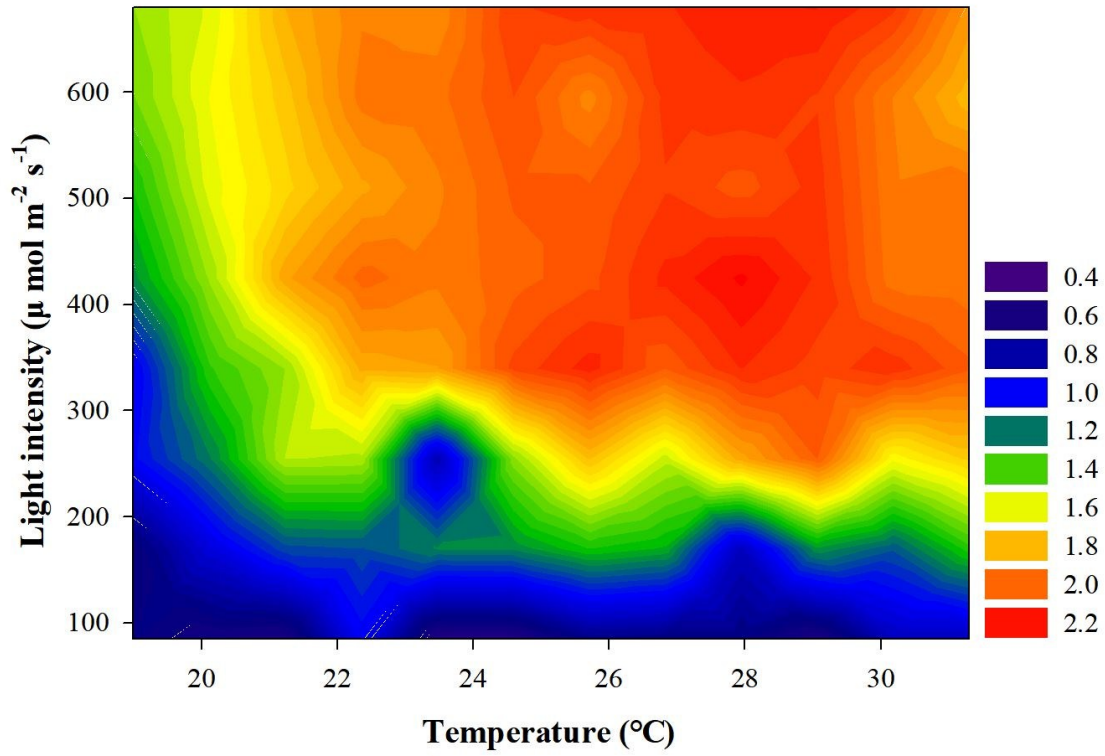

(d2) *Scenedesmus* sp. with 5 g L<sup>-1</sup> of NaHCO<sub>3</sub>

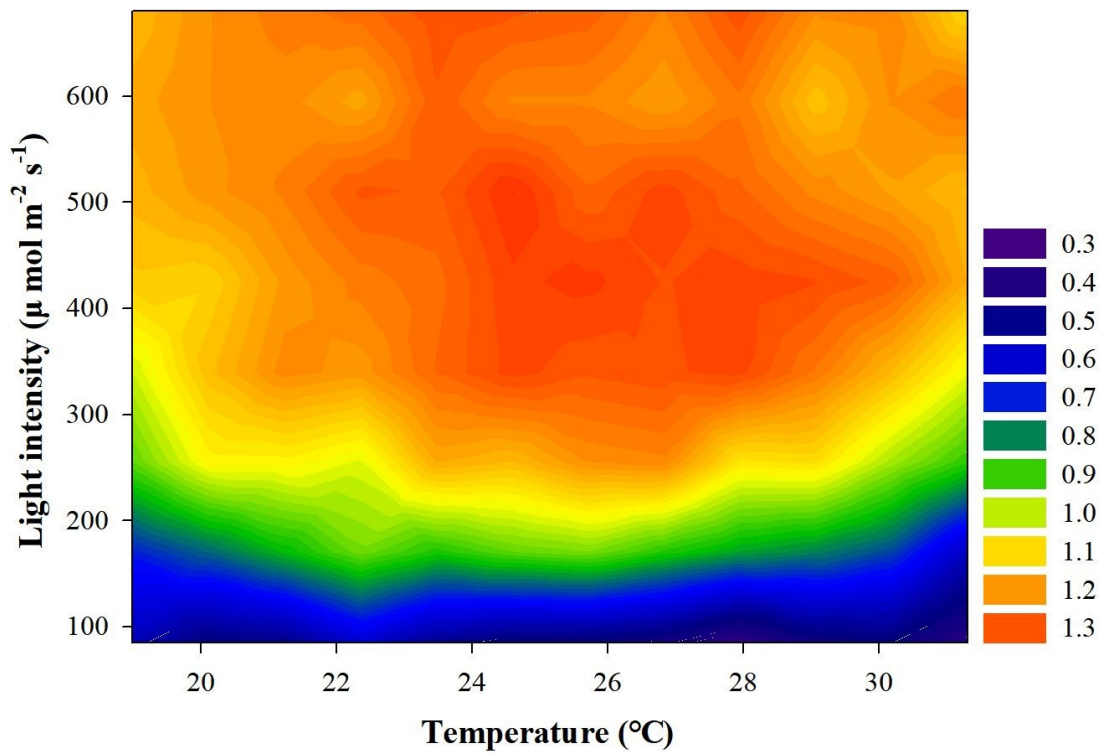

(e1) *Nannochloropsis gaditana* with 5% CO<sub>2</sub>

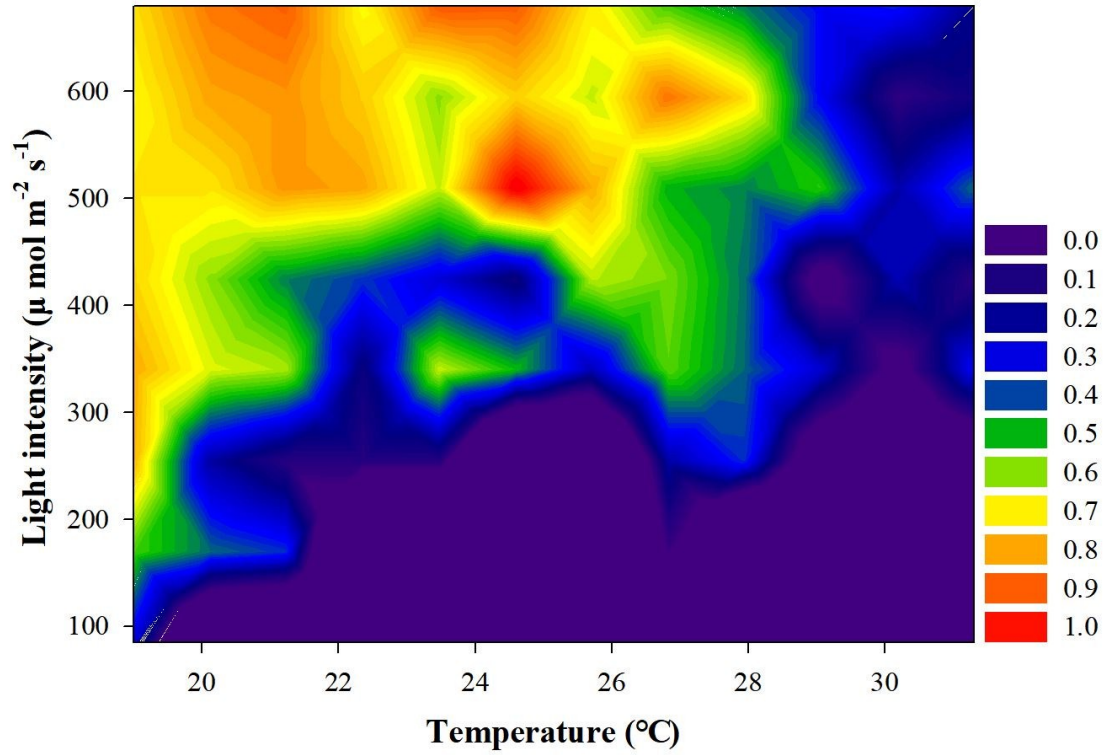

(e2) *Nannochloropsis gaditana* with 1 g L<sup>-1</sup> of NaHCO<sub>3</sub>

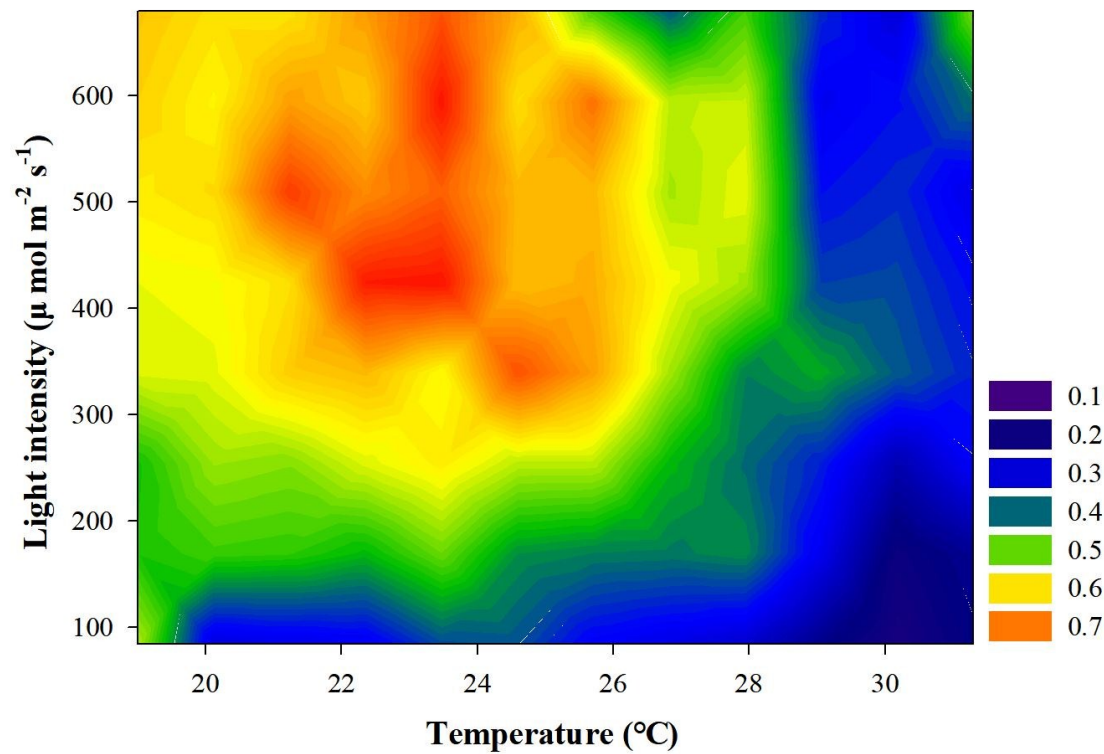

(f1) *Tetraselmis suecica* with 5% CO<sub>2</sub>

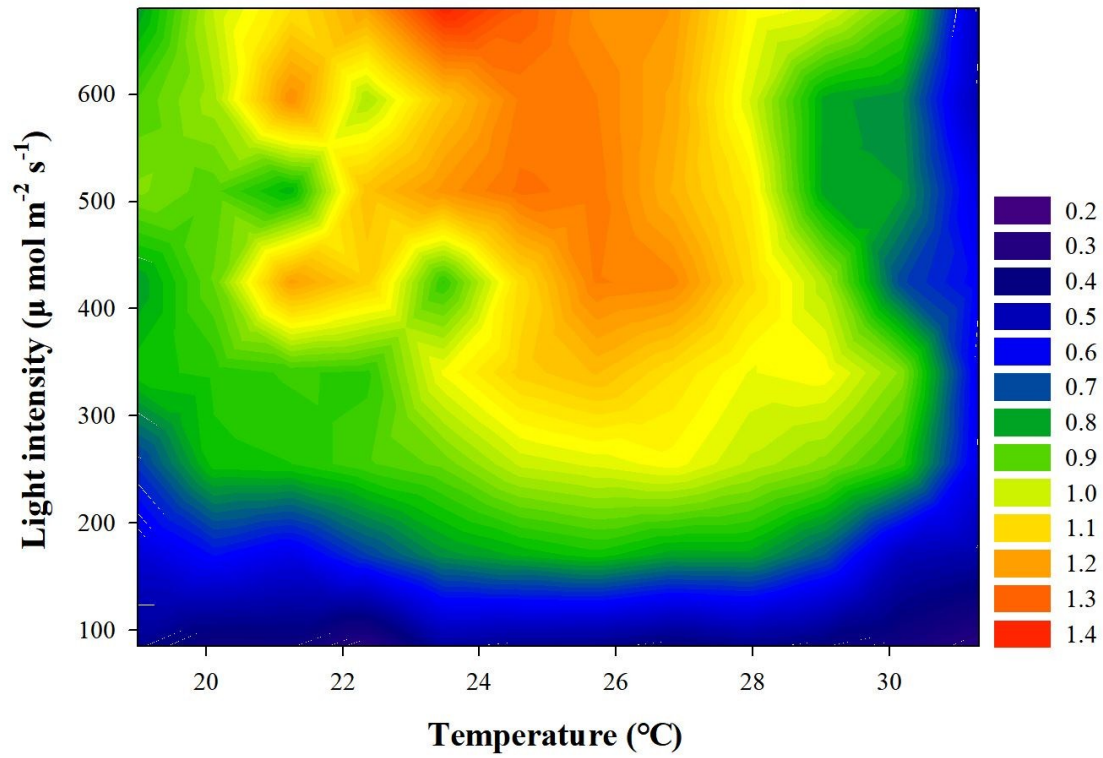

(f2) *Tetraselmis suecica* with 1 g L<sup>-1</sup> of NaHCO<sub>3</sub>

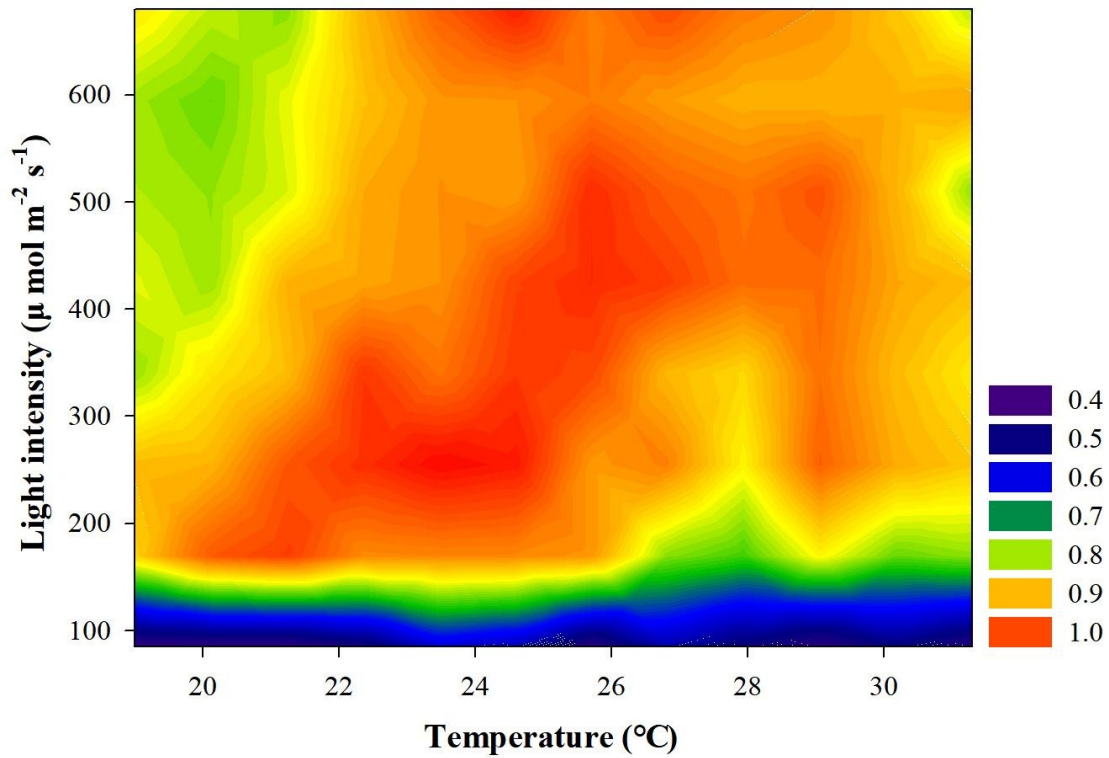

(g1) *Tetraselmis chuii* with 5% CO<sub>2</sub>

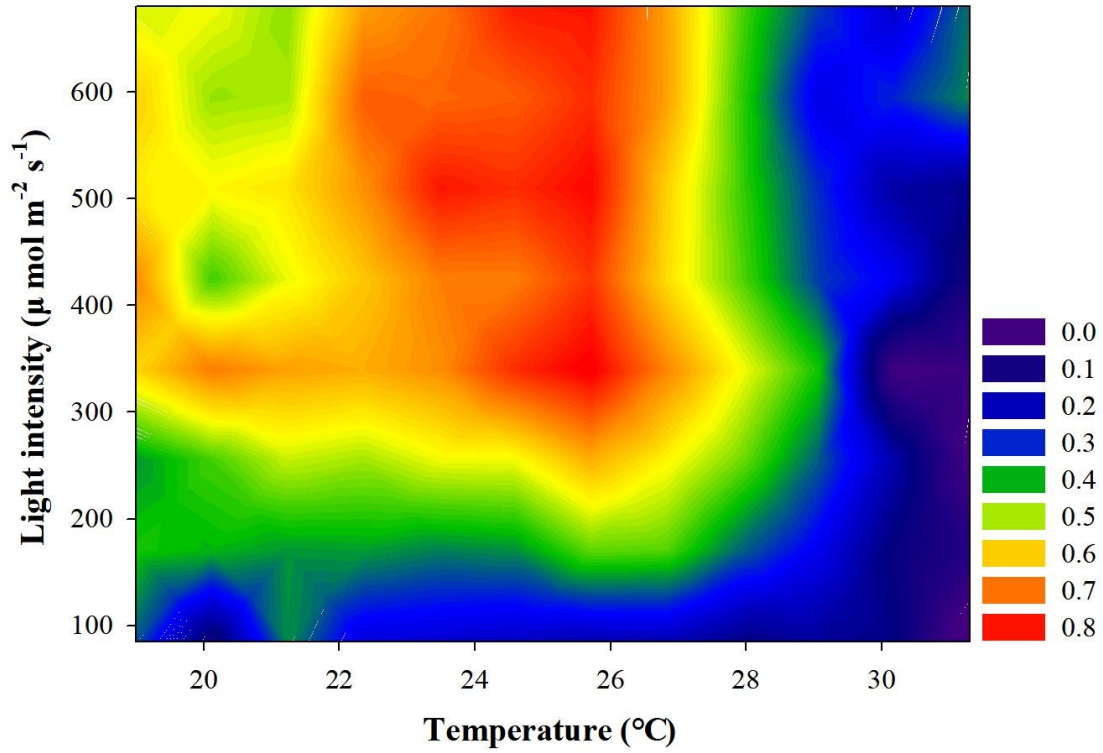

(g2) *Tetraselmis chuii* with 0.1 g L<sup>-1</sup> of NaHCO<sub>3</sub>

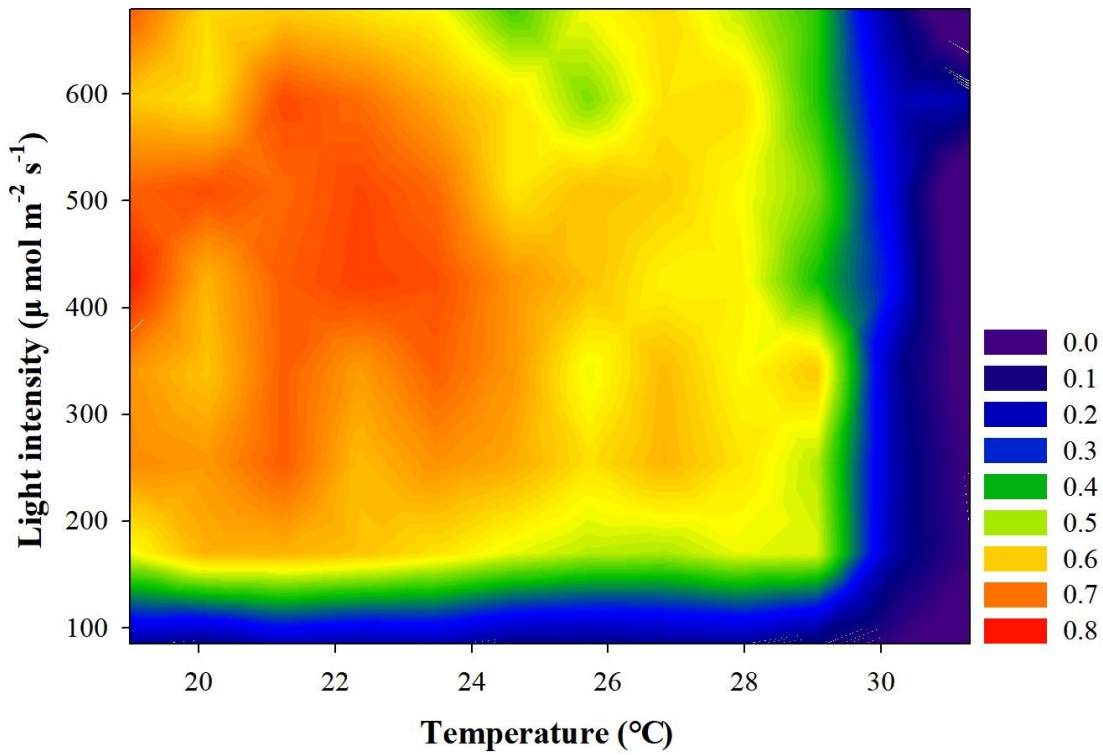

(h1) *Aphanothece* sp. with 5% CO<sub>2</sub>

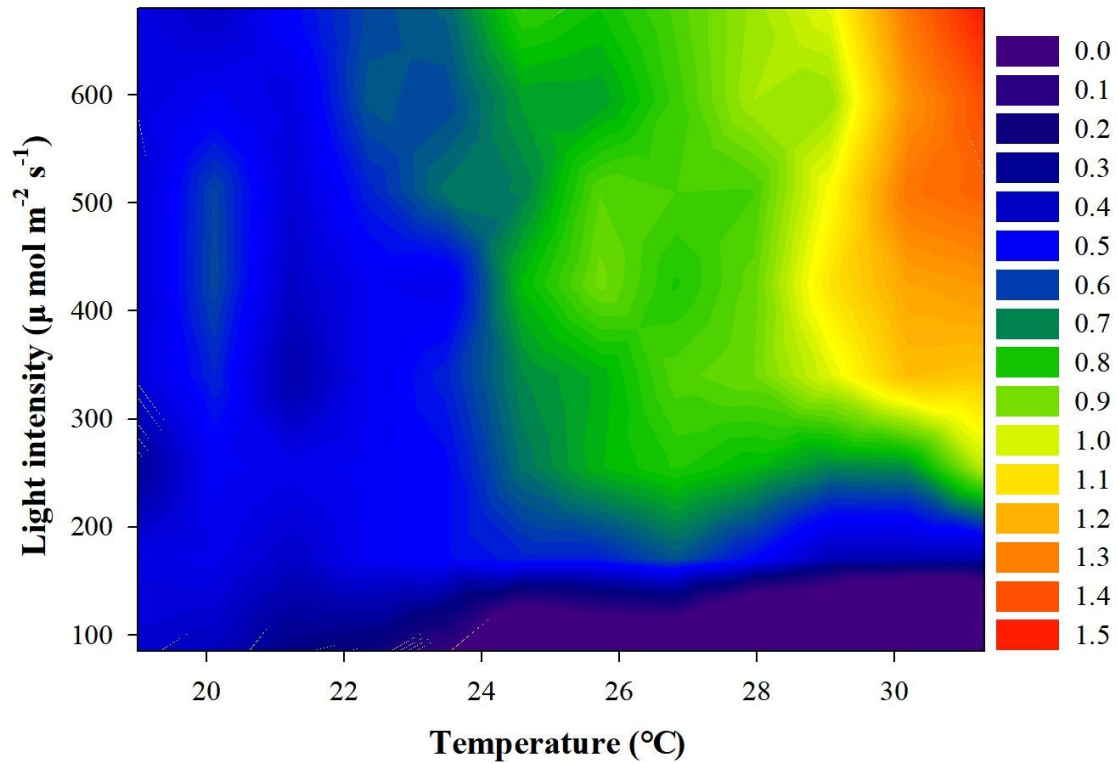

(h2) *Aphanothece* sp. with 7.5 g L<sup>-1</sup> of NaHCO<sub>3</sub>

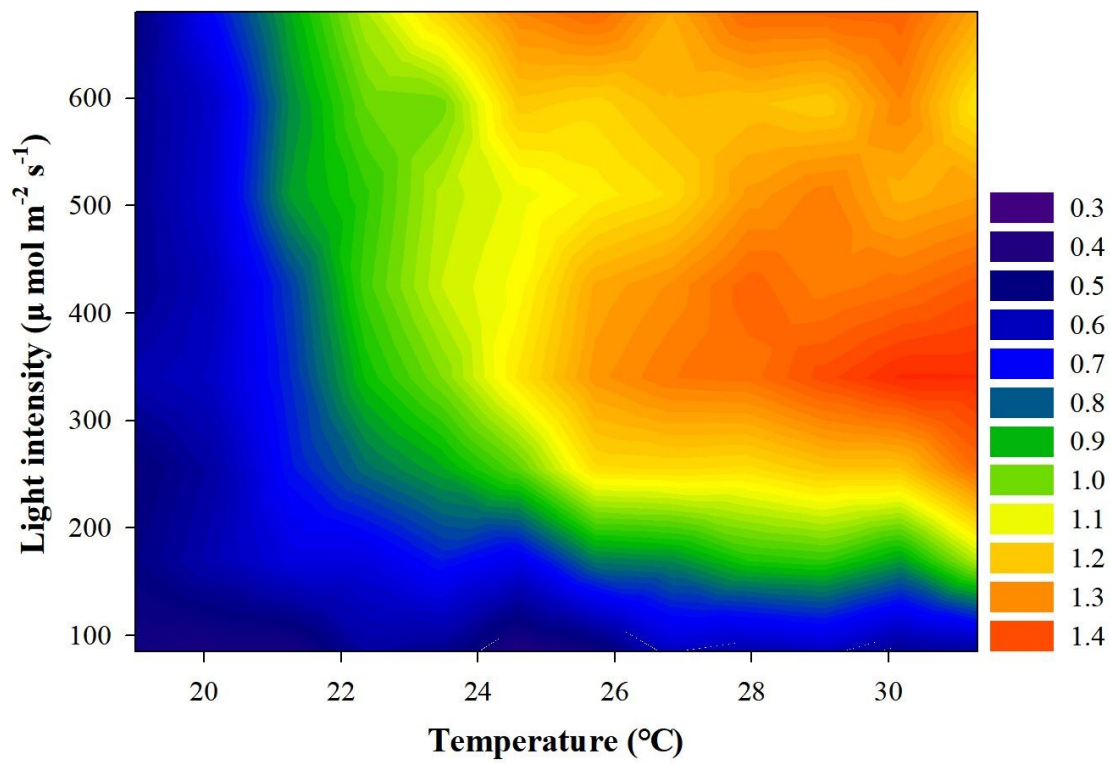

**Table S1** Scenario 1: NaHCO<sub>3</sub> without transport

| Skyonic report based <sup>1</sup>                             | Power (MW) | ton CO <sub>2</sub> -eq./yr | Cumulative ton CO <sub>2</sub> -eq./yr |
|---------------------------------------------------------------|------------|-----------------------------|----------------------------------------|
| Input CO <sub>2</sub>                                         |            |                             |                                        |
| 1. Direct carbon capture                                      |            | -250,000                    | -250,000                               |
| CO <sub>2</sub> emissions                                     |            |                             |                                        |
| Emissions from process operations                             |            |                             |                                        |
| 2. Electrochemical plant                                      | 46.58      | 173,380                     | -76,620                                |
| 3. Outgassed CO <sub>2</sub>                                  |            |                             |                                        |
| 1) 10% of input CO <sub>2</sub> assumed                       |            | 25,000                      | 1) -51,620                             |
| 2) 20% of input CO <sub>2</sub> assumed                       |            | 50,000                      | 2) -26,620                             |
| 4. HCl used for microalgae cultivation                        |            |                             |                                        |
| 1) 10% of input CO <sub>2</sub> assumed                       |            | 16,088                      | 1) -35,532                             |
| 2) 20% of input CO <sub>2</sub> assumed                       |            | 14,319                      | 2) -12,301                             |
| Emissions from transportation                                 |            |                             |                                        |
| 5. Transport of inputs and makeup water                       |            | 14,055                      | 1) -21,477<br>2) 1,754                 |
| 6. Transport of outputs (NaOCl, HCl) and wastewater           |            |                             |                                        |
| 1) 10% of input CO <sub>2</sub> assumed                       |            | 3,671                       | 1) -17,806                             |
| 2) 20% of input CO <sub>2</sub> assumed                       |            | 3,685                       | 2) 5,439                               |
| CO <sub>2</sub> reduction from replacing conventional process |            |                             |                                        |
| 7. Power saved from H <sub>2</sub> production                 | -21.67     | -80,666                     | 1) -98,472<br>2) -75,227               |
| 8. Power saved from Cl <sub>2</sub> production                | -18.27     | -68,026                     | 1) -166,498<br>2) -143,253             |

**Table S2** Scenario 2:NaHCO<sub>3</sub> with transport (100 km)

| Skyonic report based <sup>1</sup>                                        | Power<br>(MW) | ton CO <sub>2</sub> -<br>eq./yr | Cumulative<br>ton CO <sub>2</sub> -eq./yr |
|--------------------------------------------------------------------------|---------------|---------------------------------|-------------------------------------------|
| Input CO <sub>2</sub>                                                    |               |                                 |                                           |
| 1. Direct carbon capture                                                 |               | -250,000                        | -250,000                                  |
| CO <sub>2</sub> emissions                                                |               |                                 |                                           |
| Emissions from process operations                                        |               |                                 |                                           |
| 2. Electrochemical plant                                                 | 46.58         | 173,380                         | -76,620                                   |
| 3. Outgassed CO <sub>2</sub>                                             |               |                                 |                                           |
| 1) 10% of input CO <sub>2</sub> assumed                                  |               | 25,000                          | 1) -51,620                                |
| 2) 20% of input CO <sub>2</sub> assumed                                  |               | 50,000                          | 2) -26,620                                |
| 4. HCl used for microalgae cultivation                                   |               |                                 |                                           |
| 1) 10% of input CO <sub>2</sub> assumed                                  |               | 16,088                          | 1) -35,532                                |
| 2) 20% of input CO <sub>2</sub> assumed                                  |               | 14,319                          | 2) -12,301                                |
| Emissions from transportation                                            |               |                                 |                                           |
| 5. Transport of inputs and makeup water                                  |               | 14,055                          | 1) -21,477<br>2) 1,754                    |
| 6. Transport of outputs (NaOCl, HCl, NaHCO <sub>3</sub> ) and wastewater |               | 4,655                           | 1) -16,822<br>2) 6,409                    |
| CO <sub>2</sub> reduction from replacing conventional process            |               |                                 |                                           |
| 7. Power saved from H <sub>2</sub> production                            | -21.67        | -80,666                         | 1) -97,488<br>2) -74,257                  |
| 8. Power saved from Cl <sub>2</sub> production                           | -18.27        | -68,026                         | 1) -165,514<br>2) -142,283                |



### <Scenario 1 and 2>

Scenario 1 and 2 were primarily calculated based on the Skyonic report<sup>1</sup>, and then adjusted according to the initial target amounts of CO<sub>2</sub> in functional unit (250,000 ton CO<sub>2</sub>/yr).

#### 1. Direct carbon capture:

Target amounts of ton CO<sub>2</sub>/yr (250,000 ton CO<sub>2</sub>/yr from flue gas emitted by a coal-fired cement kiln).

#### 2. Electrochemical plant:

The amount of energy required for SkyMine<sup>®</sup> process including flue gas conditioning, carbon capture, electrolysis-based chlor-alkali process, H<sub>2</sub>/Cl<sub>2</sub> combustion, product drying/storing/loading and so on. (operating days = 350 days)

|                    | ton/yr          |
|--------------------|-----------------|
| <b>Input</b>       |                 |
| CO <sub>2</sub>    | 250,000         |
| NaCl               | 408,417         |
| H <sub>2</sub> O   | 681,153         |
| Energy             | <b>46.58 MW</b> |
| <b>Output</b>      |                 |
| NaHCO <sub>3</sub> | 489,175         |
| HCl                | 602,434         |
| NaOCl              | 172,730         |

**Mass balance of SkyMine<sup>®</sup> process<sup>1</sup>**

#### 3. Outgassed CO<sub>2</sub>:

Carbon utilization efficiencies of a minimum 80% to a maximum 90% were assumed; therefore, the amount of outgassed CO<sub>2</sub> was calculated from a minimum 10% to a maximum 20% of initial targeted amount of CO<sub>2</sub>.

#### 4. HCl used for microalgae cultivation:

0.59 ton HCl required/ton biomass produced<sup>2</sup>

Among 602,434 ton/yr of HCl produced,

Case1) 10% of input CO<sub>2</sub> outgassed

→ 74,385 ton/yr of HCl (10.82% of total byproducts)

Case2) 20% of input CO<sub>2</sub> outgassed

→ 66,196 ton/yr of HCl (9.63% of total byproducts)

is used for microalgae cultivation to lower the pH of culture medium.

Therefore,

Case1)  $(80,666 + 68,026) * 0.1082 = 16,088$  ton CO<sub>2</sub>-eq./yr

Case2)  $(80,666 + 68,026) * 0.0963 = 14,319$  ton CO<sub>2</sub>-eq./yr

among indirect CO<sub>2</sub> reductions, which are obtained from replacing conventional H<sub>2</sub> and Cl<sub>2</sub>-production processes, 16,088 and 14,319 ton/yr of CO<sub>2</sub> should be excluded, respectively.

#### 5. Transport of inputs and makeup water: $248 + 9,773 + 3,860 + 174 = 14,055$

A. Extraction of salt (NaCl) from sea water through solar evaporation:

2.2 kWh power consumed/ton NaCl

408,417 ton NaCl required/yr

Diesel powered pumps and conveyor belts → 248 ton CO<sub>2</sub>-eq./yr

B. Transport of salt:

Ship salt by Barge to port: 1,110 km → 9,773 ton CO<sub>2</sub>-eq./yr

Ship by train from port to plant: 588 km, 4,500 tons every 2 weeks → 3,860 ton CO<sub>2</sub>-eq./yr

C. Makeup water:

681,153 ton water/yr → 174 ton CO<sub>2</sub>-eq./yr

## 6. Transport of outputs and wastewater:

### Scenario 1 (0 km):

Case1)

489,175 ton  $\text{NaHCO}_3$  and 74,385 ton HCl is directly used in the algal pond (0 km), and residual (602,434 - 74,385) ton HCl and 172,730 ton NaOCl is transported to the market 100 km away.

$$\text{NaOCl} + \text{residual HCl} + \text{wastewater} = 2,638 + 905 + 128 = 3,671$$

Case2)

489,175 ton  $\text{NaHCO}_3$  and 66,196 ton HCl is directly used in the algal pond (0 km), and residual (602,434 - 66,196) ton HCl and 172,730 ton NaOCl is transported to the market 100 km away.

$$\text{NaOCl} + \text{residual HCl} + \text{wastewater} = 2,638 + 919 + 128 = 3,685$$

### Scenario 2 (100 km):

Case1)

489,175 ton  $\text{NaHCO}_3$  and 74,385 ton HCl is transported to the algal pond 100 km away, and residual (602,434 - 74,385) ton HCl and 172,730 ton NaOCl is transported to the market 100 km away.

$$\text{NaOCl} + \text{HCl} + \text{NaHCO}_3 + \text{wastewater} = 2,638 + 1,033 + 856 + 128 = 4,655$$

Case2)

489,175 ton  $\text{NaHCO}_3$  and 66,196 ton HCl is transported to the algal pond 100 km away, and residual (602,434 - 66,196) ton HCl and 172,730 ton NaOCl is transported to the market 100 km away.

$$\text{NaOCl} + \text{HCl} + \text{NaHCO}_3 + \text{wastewater} = 2,638 + 1,033 + 856 + 128 = 4,655$$

A. NaOCl:

172,730 ton NaOCl produced/yr, via heavy duty diesel truck, 20 tons per excursion, 100 km  $\rightarrow$  2,638 ton  $\text{CO}_2$ -eq./yr

B. HCl:

**Scenario 1:**

Case1)

(602,434 - 74,385) ton HCl/yr, via train, 4,500 tons per excursion, 100 km → 905 ton CO<sub>2</sub>-eq./yr

Case2)

(602,434 - 66,196) ton HCl/yr, via train, 4,500 tons per excursion, 100 km → 919 ton CO<sub>2</sub>-eq./yr

**Scenario 2:** 602,434 ton HCl produced/yr, via train, 4,500 tons per excursion, 100 km → 1,033 ton CO<sub>2</sub>-eq./yr

C. NaHCO<sub>3</sub>:

489,175 ton NaHCO<sub>3</sub> produced/yr, via train, 4,500 tons per excursion, 100 km → 856 ton CO<sub>2</sub>-eq./yr

D. Wastewater: 128 ton CO<sub>2</sub>-eq./yr

**7. Power saved from H<sub>2</sub> production:**

Benefits obtained by comparing to common H<sub>2</sub>-producing natural gas reformation process (45% Nat. Gas Efficiency (US Average) basis).

**8. Power saved from Cl<sub>2</sub> production:**

Benefits obtained by comparing to chlor-alkali industry standard.

In the Skyonic report<sup>1</sup>, the amount of power saved from Cl<sub>2</sub> production was assumed as 73.28 MW (272,785 ton CO<sub>2</sub>-eq./yr). This is the average electricity consumption of a chlorine electrolysis plant producing 1.1 ton of caustic and 0.03 ton of H<sub>2</sub> per ton of Cl<sub>2</sub> (molar ratio of 1.95 : 1.06 : 1).<sup>3</sup>

In this study, for fair calculation, allocation was considered.

$$73.28 \text{ MW} * 1 / (1.95 + 1.06 + 1) = 18.27 \text{ MW}$$

$$272,785 \text{ ton CO}_2\text{-eq./yr} * 1 / (1.95 + 1.06 + 1) = 68,026 \text{ ton CO}_2\text{-eq./yr}$$

In theory<sup>4</sup>,

3.49 ton NaHCO<sub>3</sub> required for 1 ton algae biomass

**90% carbon utilization efficiency → 3.88 ton NaHCO<sub>3</sub>/ton biomass**

**80% carbon utilization efficiency → 4.36 ton NaHCO<sub>3</sub>/ton biomass**

|                                                               |                        | NaHCO <sub>3</sub> |          |
|---------------------------------------------------------------|------------------------|--------------------|----------|
| Carbon utilization efficiency (%)                             |                        | 80                 | 90       |
| Net CO <sub>2</sub> emission<br>(ton CO <sub>2</sub> -eq./yr) | No transport<br>(0 km) | -143,253           | -166,498 |
|                                                               | Transport<br>(100 km)  | -142,283           | -165,514 |
| Biomass produced<br>(ton biomass/yr)                          |                        | 112,196            | 126,076  |

**Scenario 1 (0 km), 10% CO<sub>2</sub> outgassed:**

ton biomass/3.88 ton NaHCO<sub>3</sub> → 126,076 ton biomass/489,175 ton NaHCO<sub>3</sub>

**Scenario 1 (0 km), 20% CO<sub>2</sub> outgassed:**

ton biomass/4.36 ton NaHCO<sub>3</sub> → 112,196 ton biomass/489,175 ton NaHCO<sub>3</sub>

**Scenario 2 (100 km), 10% CO<sub>2</sub> outgassed:**

ton biomass/3.88 ton NaHCO<sub>3</sub> → 126,076 ton biomass/489,175 ton NaHCO<sub>3</sub>

**Scenario 2 (100 km), 20% CO<sub>2</sub> outgassed:**

ton biomass/4.36 ton NaHCO<sub>3</sub> → 112,196 ton biomass/489,175 ton NaHCO<sub>3</sub>

**Table S3** Scenario 3: direct flue gas injection without transport

| Direct flue gas injection               | ton CO <sub>2</sub> -eq./yr | Cumulative<br>ton CO <sub>2</sub> -<br>eq./yr |
|-----------------------------------------|-----------------------------|-----------------------------------------------|
| Input CO <sub>2</sub>                   |                             |                                               |
| 1. Direct carbon capture                | -250,000                    | -250,000                                      |
| CO <sub>2</sub> emissions               |                             |                                               |
| Emissions from process operations       |                             |                                               |
| 2. Electricity energy required          | 2,359                       | -247,641                                      |
| 3. Outgassed CO <sub>2</sub>            |                             |                                               |
| 1) 75% of input CO <sub>2</sub> assumed | 187,500                     | 1) -60,141                                    |
| 2) 90% of input CO <sub>2</sub> assumed | 225,000                     | 2) -22,641                                    |

**Table S4** Scenario 4: direct flue gas injection with transport (100 km)

| Direct flue gas injection                 | ton CO <sub>2</sub> -eq./yr | Cumulative<br>ton CO <sub>2</sub> -<br>eq./yr |
|-------------------------------------------|-----------------------------|-----------------------------------------------|
| Input CO <sub>2</sub>                     |                             |                                               |
| 1. Direct carbon capture                  | -250,000                    | -250,000                                      |
| CO <sub>2</sub> emissions                 |                             |                                               |
| Emissions from process operations         |                             |                                               |
| 2. Electricity energy required            | 2,359                       | -247,641                                      |
| 3. Outgassed CO <sub>2</sub>              |                             |                                               |
| 1) 75% of input CO <sub>2</sub> assumed   | 187,500                     | 1) -60,141                                    |
| 2) 90% of input CO <sub>2</sub> assumed   | 225,000                     | 2) -22,641                                    |
| Emissions from transportation             |                             |                                               |
| 4. Compressing CO <sub>2</sub> to 150 atm | 84,450                      | 1) 24,309<br>2) 61,809                        |
| 5. Transport of CO <sub>2</sub> (100km)   | 1,750                       | 1) 26,059<br>2) 63,559                        |

## <Scenario 3 and 4>

### 1. Direct carbon capture:

Target amounts of CO<sub>2</sub> in functional unit (250,000 ton CO<sub>2</sub>/yr)

### 2. Electricity energy required:

22.2 kWh/ton CO<sub>2</sub> of electricity required.<sup>5</sup>

The source of electricity used in this study was the same as that used in the Skyonic report for the consistency with Scenario 1 and 2 (by a natural gas combined cycle power plant: 2,353 kWh/ton CO<sub>2</sub>).

### 3. Outgassed CO<sub>2</sub>:

Carbon utilization efficiencies of a minimum 10% to a maximum 25% were assumed; therefore, the amount of outgassed CO<sub>2</sub> was calculated from a minimum 75% to a maximum 90% of initial targeted amount of CO<sub>2</sub>.

### 4. Compressing CO<sub>2</sub> to 150 atm:

Total mechanical work consumed in compressing CO<sub>2</sub> to 150 atm was assumed as 400.6 MJ/ton CO<sub>2</sub>.<sup>6</sup>

In particular, it was multiplied by 1/0.14, considering that the raw flue gas contains only 14%(v/v) of CO<sub>2</sub>.

### 5. Transport of CO<sub>2</sub> (100km):

The power consumed to transport CO<sub>2</sub> every 100 km was assumed as 8.3 MJ/ton CO<sub>2</sub>.<sup>6</sup> It was multiplied by 1/0.14 as well.

**Table S5** Scenario 5: MEA-extracted pure CO<sub>2</sub> injection without transport

| MEA-extracted pure CO <sub>2</sub> injection | ton CO <sub>2</sub> -eq./yr | Cumulative<br>ton CO <sub>2</sub> -<br>eq./yr |
|----------------------------------------------|-----------------------------|-----------------------------------------------|
| Input CO <sub>2</sub>                        |                             |                                               |
| 1. Direct carbon capture                     | -250,000                    | -250,000                                      |
| CO <sub>2</sub> emissions                    |                             |                                               |
| Emissions from process operations            |                             |                                               |
| 2. Steam energy required                     | 76,213                      | -173,787                                      |
| 3. Electricity energy required               | 3,469                       | -170,318                                      |
| 4. Outgassed CO <sub>2</sub>                 |                             |                                               |
| 1) 75% of input CO <sub>2</sub> assumed      | 187,500                     | 1) 17,182                                     |
| 2) 90% of input CO <sub>2</sub> assumed      | 225,000                     | 2) 54,682                                     |

**Table S6** Scenario 6: MEA-extracted pure CO<sub>2</sub> injection with transport (100 km)

| MEA-extracted pure CO <sub>2</sub> injection | ton CO <sub>2</sub> -<br>eq./yr | Cumulative<br>ton CO <sub>2</sub> -<br>eq./yr |
|----------------------------------------------|---------------------------------|-----------------------------------------------|
| Input CO <sub>2</sub>                        |                                 |                                               |
| 1. Direct carbon capture                     | -250,000                        | -250,000                                      |
| CO <sub>2</sub> emissions                    |                                 |                                               |
| Emissions from process operations            |                                 |                                               |
| 2. Steam energy required                     | 76,213                          | -173,787                                      |
| 3. Electricity energy required               | 3,469                           | -170,318                                      |
| 4. Outgassed CO <sub>2</sub>                 |                                 |                                               |
| 1) 75% of input CO <sub>2</sub> assumed      | 187,500                         | 1) 17,182                                     |
| 2) 90% of input CO <sub>2</sub> assumed      | 225,000                         | 2) 54,682                                     |
| Emissions from transportation                |                                 |                                               |
| 5. Compressing CO <sub>2</sub> to 150 atm    | 11,823                          | 1) 29,005<br>2) 66,505                        |
| 6. Transport of CO <sub>2</sub> (100km)      | 245                             | 1) 29,250<br>2) 66,750                        |



## <Scenario 5 and 6>

### 1. Direct carbon capture:

Target amounts of CO<sub>2</sub> in functional unit (250,000 ton CO<sub>2</sub>/yr)

### 2. Steam energy required:

2,010 kg/ton CO<sub>2</sub> of steam is required for MEA extraction, and the energy required to transform water to steam was evaluated as 2.6 MJ/kg steam.<sup>5</sup>

Natural gas was assumed to be burned for the steam generation (0.21 kg CO<sub>2</sub>/kWh natural gas).<sup>7</sup>

### 3. Electricity energy required:

32.65 kWh/ton CO<sub>2</sub> of electricity is required.<sup>5</sup>

The source of electricity used in this study was the same as that used in the Skyonic report for the consistency with Scenario 1 and 2 (by a natural gas combined cycle power plant: 2,353 kWh/ton CO<sub>2</sub>).

### 4. Outgassed CO<sub>2</sub>:

Carbon utilization efficiencies of a minimum 10% to a maximum 25% were assumed; therefore, the amount of outgassed CO<sub>2</sub> was calculated from a minimum 75% to a maximum 90% of initial targeted amount of CO<sub>2</sub>.

### 5. Compressing CO<sub>2</sub> to 150 atm:

Total mechanical work consumed in compressing CO<sub>2</sub> to 150 atm was assumed as 400.6 MJ/ton CO<sub>2</sub>.<sup>6</sup>

### 6. Transport of CO<sub>2</sub> (100km):

The power consumed to transport CO<sub>2</sub> every 100 km was assumed as 8.3 MJ/ton CO<sub>2</sub>.<sup>6</sup>

In theory<sup>4</sup>,

1.83 ton CO<sub>2</sub> required for 1 ton algae biomass

**10% carbon utilization efficiency → 18.3 ton CO<sub>2</sub>/ton biomass**

**25% carbon utilization efficiency → 7.3 ton CO<sub>2</sub>/ton biomass**

**Scenario 3 (0 km), 75% CO<sub>2</sub> outgassed:**

ton biomass/7.3 ton CO<sub>2</sub> → 34,247 ton biomass/250,000 ton CO<sub>2</sub>

**Scenario 3 (0 km), 90% CO<sub>2</sub> outgassed:**

ton biomass/18.3 ton CO<sub>2</sub> → 13,661 ton biomass/250,000 ton CO<sub>2</sub>

**Scenario 4 (100 km), 75% CO<sub>2</sub> outgassed:**

ton biomass/7.3 ton CO<sub>2</sub> → 34,247 ton biomass/250,000 ton CO<sub>2</sub>

**Scenario 4 (100 km), 90% CO<sub>2</sub> outgassed:**

ton biomass/18.3 ton CO<sub>2</sub> → 13,661 ton biomass/250,000 ton CO<sub>2</sub>

**Scenario 5 (0 km), 75% CO<sub>2</sub> outgassed:**

ton biomass/7.3 ton CO<sub>2</sub> → 34,247 ton biomass/250,000 ton CO<sub>2</sub>

**Scenario 5 (0 km), 90% CO<sub>2</sub> outgassed:**

ton biomass/18.3 ton CO<sub>2</sub> → 13,661 ton biomass/250,000 ton CO<sub>2</sub>

**Scenario 6 (100 km), 75% CO<sub>2</sub> outgassed:**

ton biomass/7.3 ton CO<sub>2</sub> → 34,247 ton biomass/250,000 ton CO<sub>2</sub>

**Scenario 6 (100 km), 90% CO<sub>2</sub> outgassed:**

ton biomass/18.3 ton CO<sub>2</sub> → 13,661 ton biomass/250,000 ton CO<sub>2</sub>

**Table S7** Net CO<sub>2</sub> emissions according to various carbon utilization efficiency

| Carbon utilization efficiency (%) | Net CO <sub>2</sub> emissions (ton CO <sub>2</sub> -eq./yr) |                              |                         |                           |                              |                                |
|-----------------------------------|-------------------------------------------------------------|------------------------------|-------------------------|---------------------------|------------------------------|--------------------------------|
|                                   | Scenario 1                                                  | Scenario 2                   | Scenario 3              | Scenario 4                | Scenario 5                   | Scenario 6                     |
|                                   | NaHCO <sub>3</sub><br>0 km                                  | NaHCO <sub>3</sub><br>100 km | Direct flue gas<br>0 km | Direct flue gas<br>100 km | Pure CO <sub>2</sub><br>0 km | Pure CO <sub>2</sub><br>100 km |
| 10                                | 19,312                                                      | 20,182                       | -22,641                 | 63,559                    | 54,682                       | 66,750                         |
| 20                                | -3,903                                                      | -3,019                       | -47,641                 | 38,559                    | 29,682                       | 41,750                         |
| 30                                | -27,133                                                     | -26,234                      | -72,641                 | 13,559                    | 4,682                        | 16,750                         |
| 40                                | -50,363                                                     | -49,450                      | -97,641                 | -11,441                   | -20,318                      | -8,250                         |
| 50                                | -73,578                                                     | -72,651                      | -122,641                | -36,441                   | -45,318                      | -33,250                        |
| 60                                | -96,807                                                     | -95,866                      | -147,641                | -61,441                   | -70,318                      | -58,250                        |
| 70                                | -120,037                                                    | -119,082                     | -172,641                | -86,441                   | -95,318                      | -83,250                        |
| 80                                | -143,253                                                    | -142,283                     | -197,641                | -111,441                  | -120,318                     | -108,250                       |
| 90                                | -166,498                                                    | -165,514                     | -222,641                | -136,441                  | -145,318                     | -133,250                       |

**Fig. S3.** Net CO<sub>2</sub> emissions according to various carbon utilization efficiency.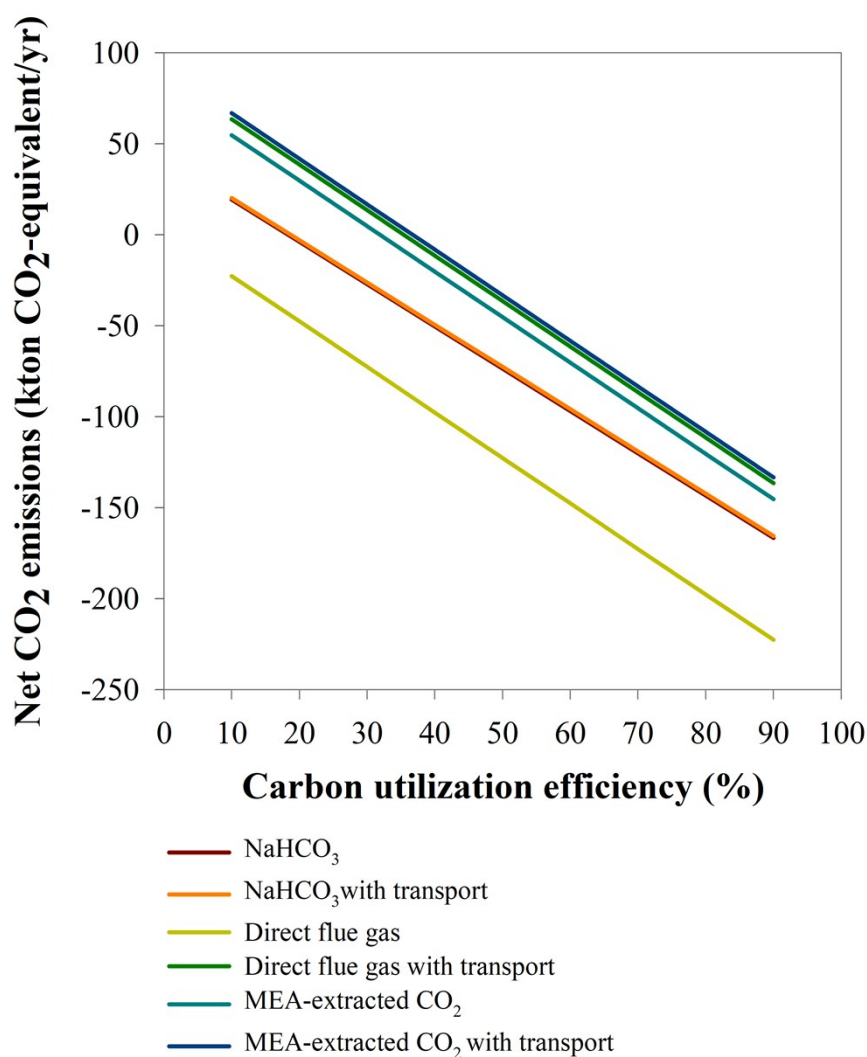

**Table S8** Net CO<sub>2</sub> emissions according to the transport distance

\* 10% carbon utilization efficiency assumed

Net CO<sub>2</sub> emissions (ton CO<sub>2</sub>-eq./yr)

| Transport distance (km) | <b>Scenario 4</b><br>Direct flue gas | <b>Scenario 6</b><br>Pure CO <sub>2</sub> |
|-------------------------|--------------------------------------|-------------------------------------------|
| 100                     | 63,559                               | 66,750                                    |
| 200                     | 65,309                               | 66,995                                    |
| 300                     | 67,059                               | 67,240                                    |
| 400                     | 68,809                               | 67,485                                    |
| 500                     | 70,559                               | 67,730                                    |
| 600                     | 72,309                               | 67,975                                    |

**Fig. S4.** Net CO<sub>2</sub> emissions according to the transport distance.

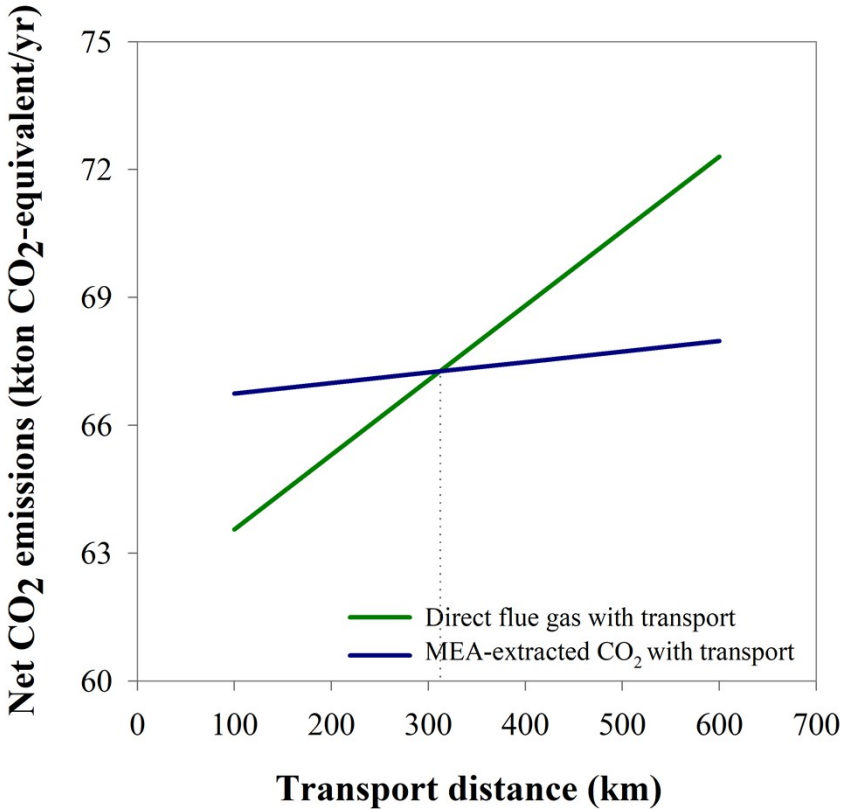

## References

- 1 J. Jones, C. Barton, M. Clayton and A. Yablonsky, *SkyMine® Carbon mineralization pilot project final phase 1 topical report*, 2011.
- 2 G.-Y. Kim, J. Heo, H.-S. Kim and J.-I. Han, *Bioresour. Technol.*, 2017, **237**, 72–77.
- 3 Euro Chlor, *The European Chlor-Alkali industry : an electricity intensive sector exposed to carbon leakage*, 2010.
- 4 R. Slade and A. Bauen, *Biomass and Bioenergy*, 2013, **53**, 29–38.
- 5 K. L. Kadam, *Energy*, 2002, **27**, 905–922.
- 6 Z. X. Zhang, G. X. Wang, P. Massarotto and V. Rudolph, *Energy Convers. Manag.*, 2006, **47**, 702–715.
- 7 City of Winnipeg, *Emission factors in kg CO<sub>2</sub>-equivalent per unit*, 2011.
